# Supplementary material
Source: Springer Nature journal article supplement (https://www.springermedizin.de/resource/supplementary/12889_2012_5010_MOESM2_ESM.pdf/9496166)
Supplement: MOESM2 [file 9496166]

## Enrollment

Assessment of eligibility  
( 43 groups from 17 health checkup divisions at companies or communities)

Exclude (0 groups)

Randomized (43 groups)

## Allocation

Control arm  
(21 groups)

Intervention arm  
(22 groups)

Letter of Invitation sent to  
20-65 year-old subjects with a  
FPG of 100-125 mg/dl or a  
CPG of 118-143 mg/dl\*2  
(n=7494)

Letter of invitation sent to  
20-65 year-old subjects with  
a FPG of 100-125 mg/dl or a  
CPG of 118-143 mg/dl\*2  
(n=6979)

Exclude (n=5851)  
Meets exclusion criteria  
Eligible but refused

Exclude (n=5488)  
Meets exclusion criteria  
Eligible but refused

Control arm  
(21 groups; n=1643)

Intervention arm  
(22 groups; n=1491)

Exclude  
Did not meet inclusion criteria  
(n=39)  
Did meet exclusion criteria  
(n=80)

Exclude  
Did not meet inclusion criteria  
(n=38)  
Did meet exclusion criteria  
(n=80)

Exclude  
FPG not available  
1 group  
CPG of 118-143 mg/dl  
(n=20)

Exclude  
FPG not available  
2 groups  
CPG of 118-143 mg/dl  
(n=37)

## Baseline assessment

Control arm  
20 groups  
(n=1504)

Intervention arm  
20 groups  
(n=1336)

\*1 FPG; fasting plasma glucose

\*2 CPG; casual plasma glucose
